# Supplementary material
Source: PubMed Central journal article supplement (PMC4968207)
Supplement: NIHMS805341-supplement-supplemental.pdf [file NIHMS805341-supplement-supplemental.pdf]

# Heterologous Fibrils Shows Distinctive Kinetic and Conformational Specificity.

*Luis M. Blancas-Mejía<sup>†</sup> and Marina Ramirez-Alvarado<sup>\*,†,‡</sup>.*

<sup>†</sup>Department of Biochemistry and Molecular Biology; <sup>‡</sup>Immunology, Mayo Clinic, 200 First St. SW, Rochester, MN 55905.

KEYWORD: Seeding; fibril; monomer; nucleation; conformational specificity.

## Supporting Information for Publication

SUPPLEMENTAL FIGURE 1

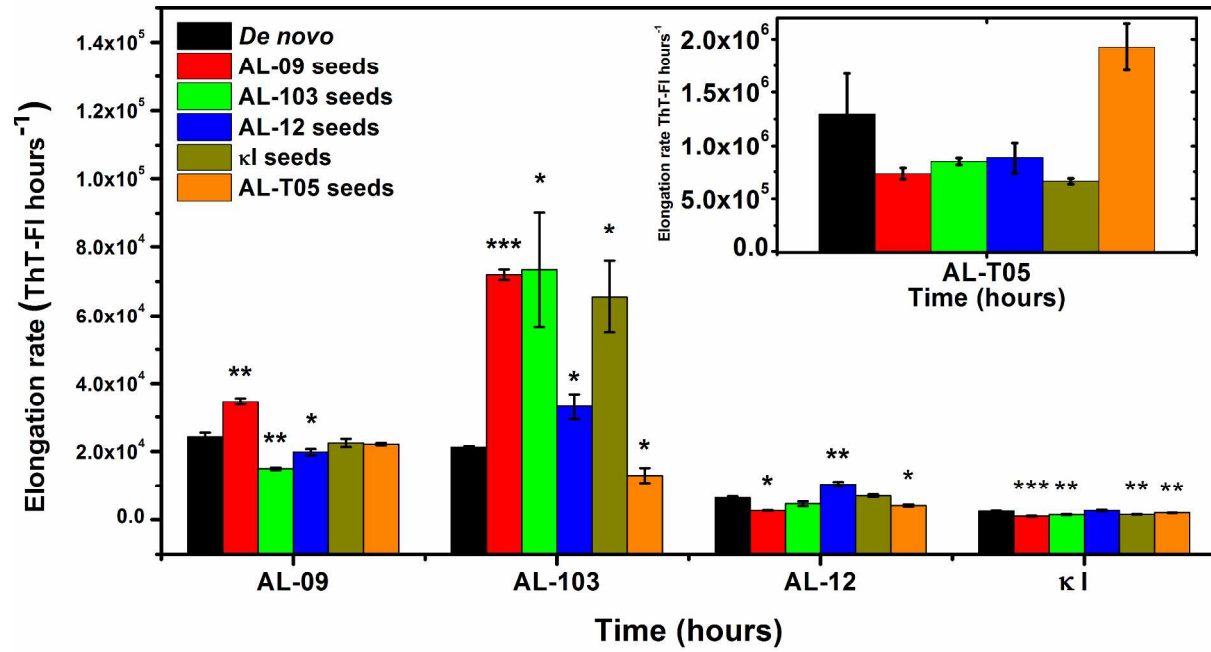

**FIGURE S1.** Effect of seeding on the rates of fibril elongation of  $V_L$  proteins. Comparison of elongation rates as a function of the protein employed. Data are from fibril formation reactions conducted in triplicate. P-values were calculated with respect to *de novo* reaction. \*  $P \leq 0.05$ ; \*\*  $P \leq 0.01$ ; \*\*\*  $P \leq 0.001$ .

## SUPPLEMENTAL FIGURE 2

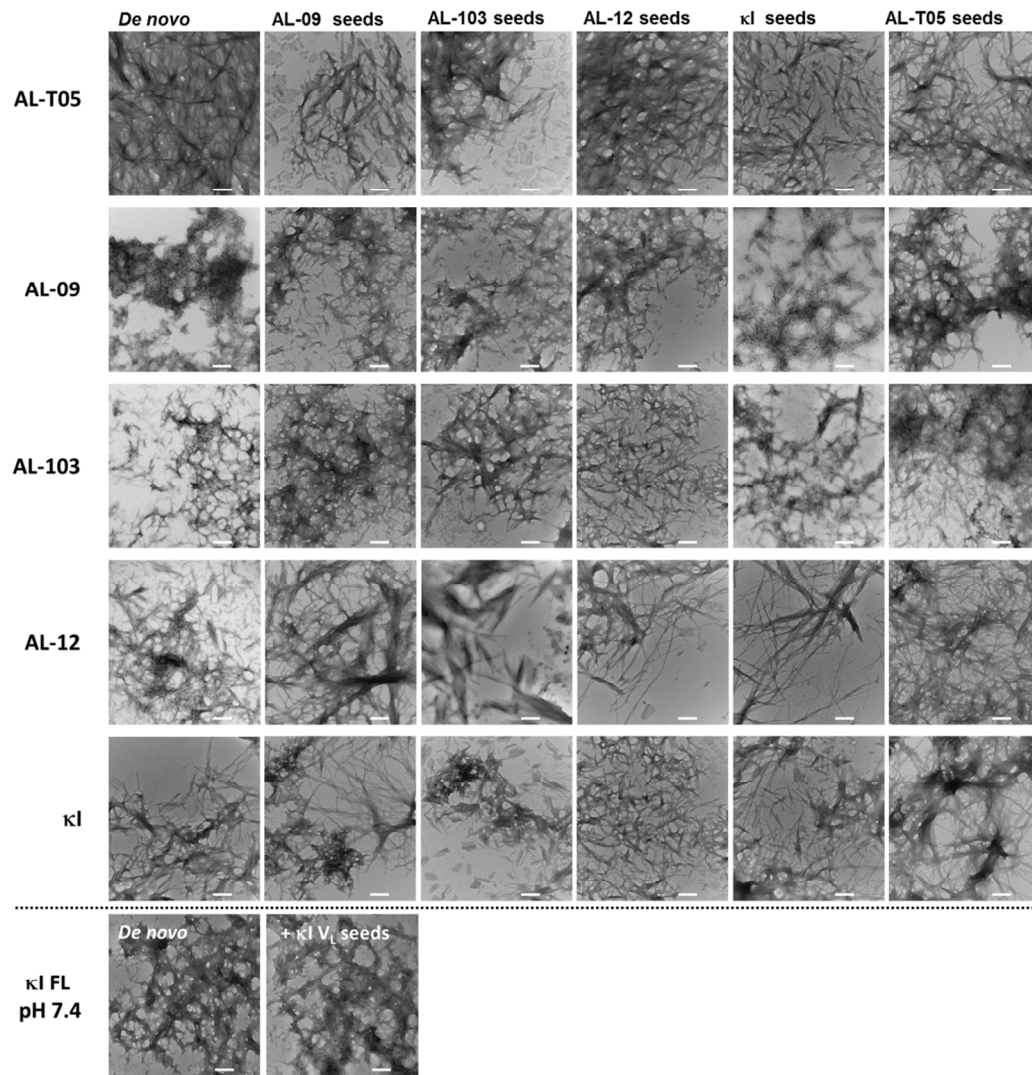

**FIGURE S2.** Transmission electron microscopy (TEM) images of *de novo*, self and cross-seeding experiments at the endpoint of the reaction. All reactions were performed with 20  $\mu$ M protein and in presence of 1% of seeds. AL-09 Scale bar represent 200 nm.

SUPPLEMENTAL FIGURE 3

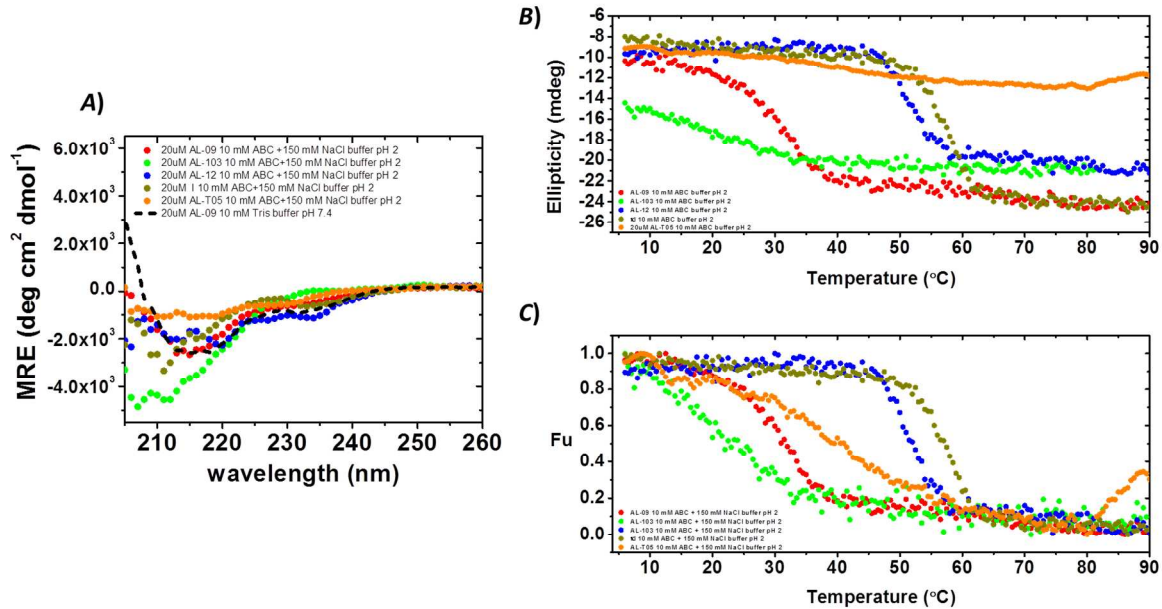

**FIGURE S3.** A) Far UV-CD spectra, (B) raw and (c) normalized thermal unfolding data of AL-09 (red), AL-103 (green), AL-12 (blue), AL-T05 (orange), κI (green olive). 20 μM protein samples were prepared in 10 mM ABC, pH 2.0. Far UV-CD spectra were acquired at 4°C. Thermal denaturation experiments were performed from 4–90°C at a rate of 0.5°C min<sup>-1</sup>.

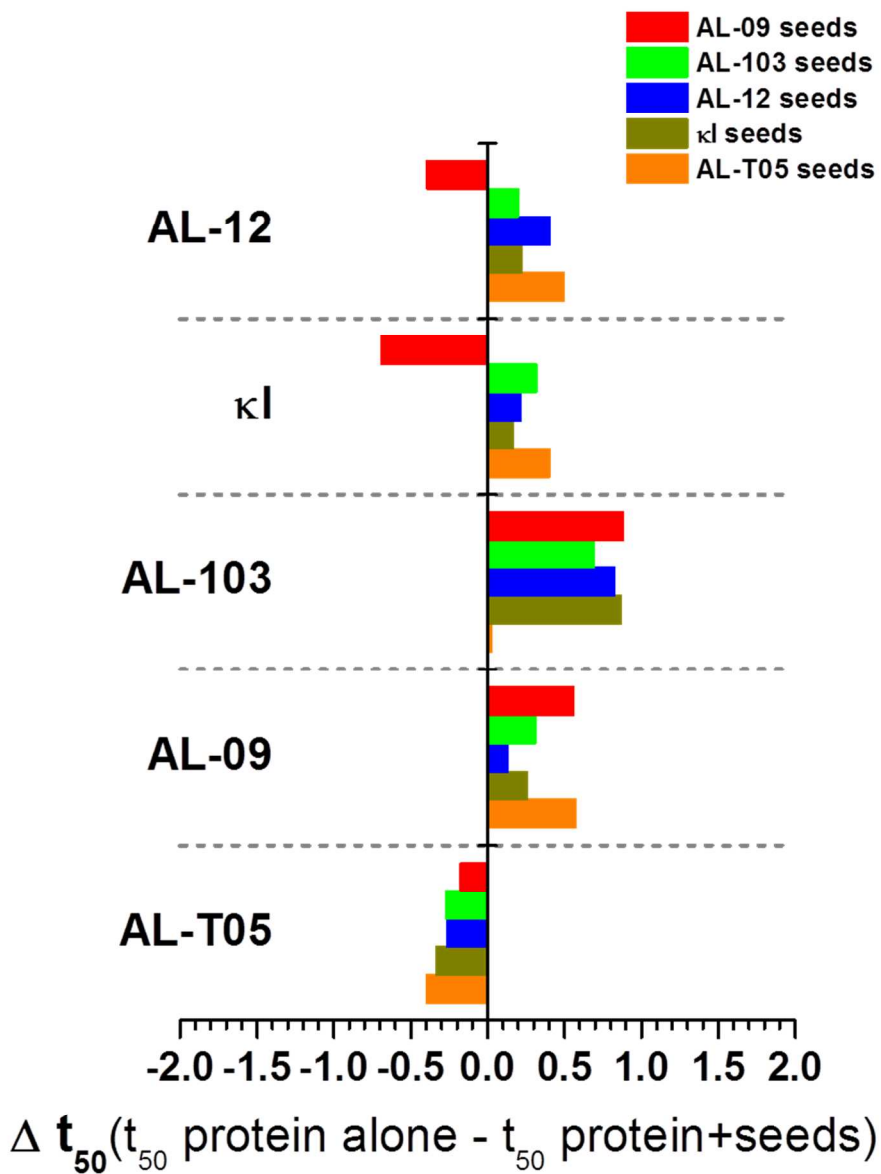

**FIGURE S4.** Comparison of normalized  $\Delta t_{50}$  values, as a function of the seed employed. Data are from fibril formation reactions conducted in triplicate. Reaction was considered positive when ThT fluorescence increased four-fold ( $>200,000$  A.U). All proteins tested were able to form fibrils at pH 2.0.
